# Supplementary material
Source: publisher figshare collection journal article supplement (https://acs.figshare.com/ndownloader/files/12712460)
Supplement: Supplementary file 1 [file 12712460]

## **Supporting Information**

# **Amino-Modified Fe-Terephthalate Metal-Organic Framework as an Efficient Catalyst for the Selective Oxidation of H<sub>2</sub>S**

Xiao-Xiao Zheng, Li-Juan Shen, Xiao-Ping Chen, Xiao-Hai Zheng, Chak-Tong Au,  
and Li-Long Jiang\*

National Engineering Research Center of Chemical Fertilizer Catalyst, Fuzhou  
University, Fuzhou, Fujian 350002, P. R. China. E-mail: jll@fzu.edu.cn

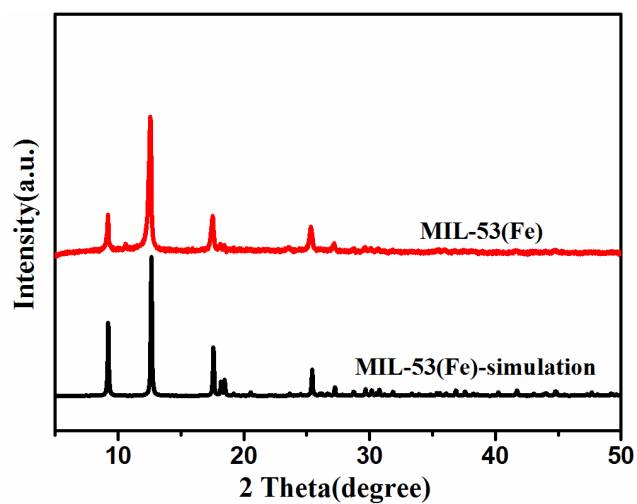

**Figure S1.** XRD patterns of MIL-53(Fe) synthesized in the present study and that reported in literature simulated here for comparison.

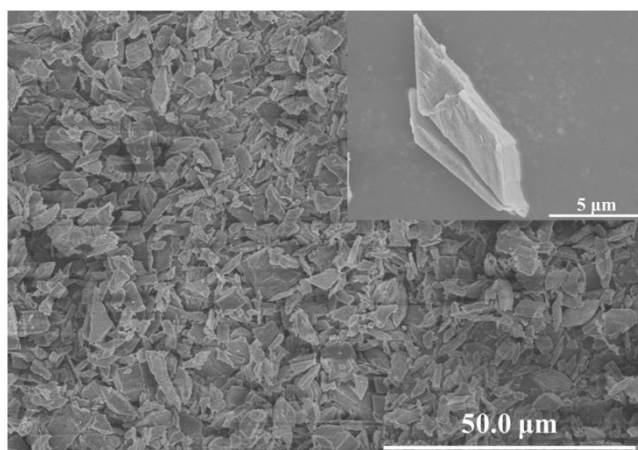

**Figure S2.** SEM images of MIL-53(Fe).

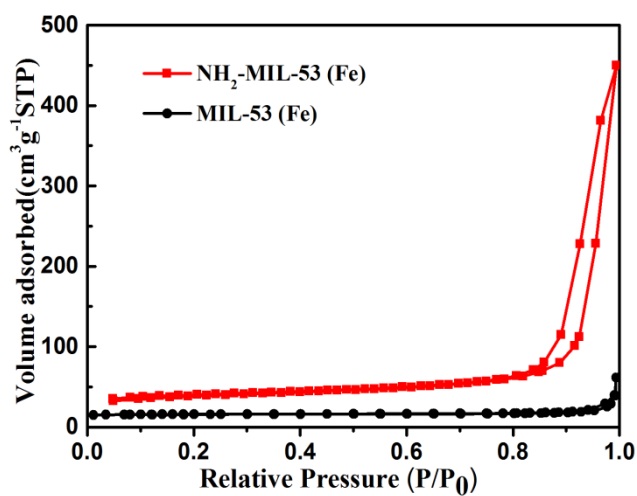

**Figure S3.** N<sub>2</sub> adsorption-desorption isotherms of MIL-53(Fe) and NH<sub>2</sub>-MIL-53(Fe).

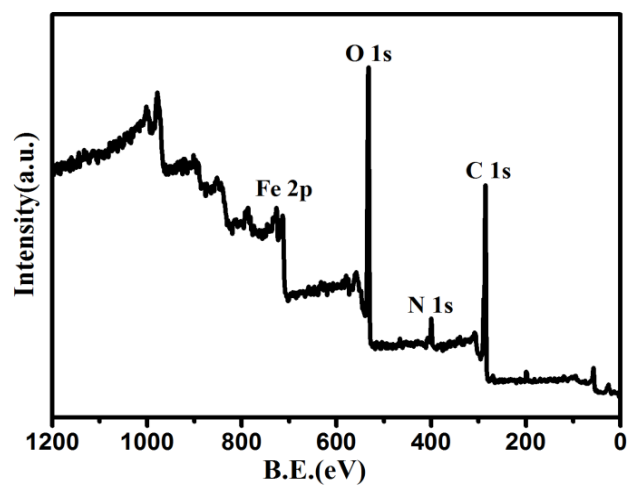

**Figure S4.** XPS survey spectrum of  $\text{NH}_2\text{-MIL-53(Fe)}$ .

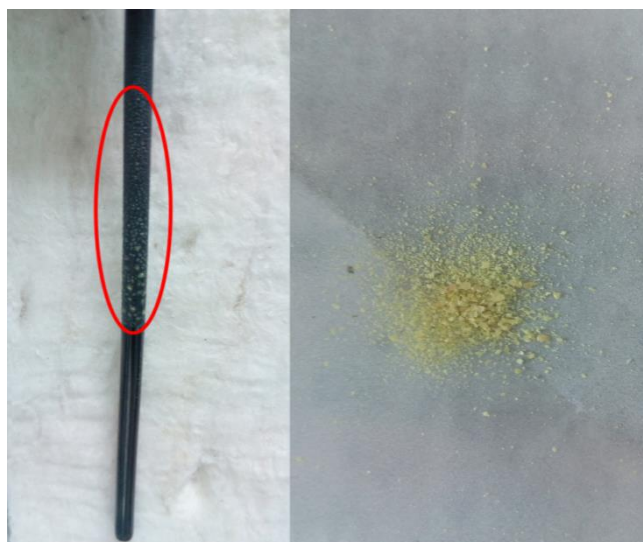

**Figure S5.** Pictures of sulfur recovered from the effluent.

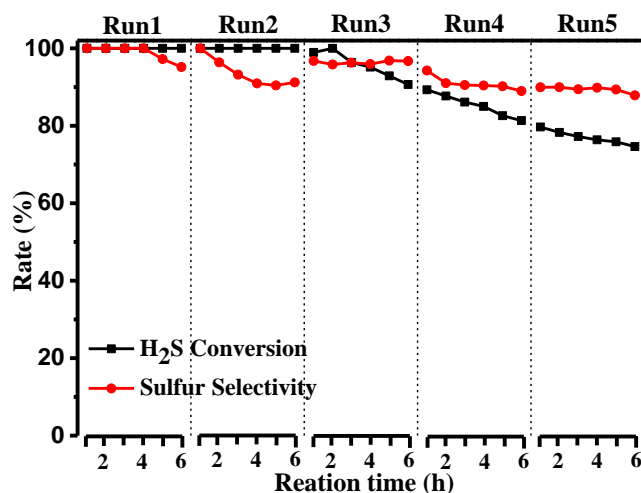

**Figure S6.** Stability test of NH<sub>2</sub>-MIL-53(Fe) at 160 °C. Reaction conditions: catalyst (0.2 g), H<sub>2</sub>S/O<sub>2</sub>/N<sub>2</sub> = 5/2.5/92.5 (wt %), WHSV (3000 mL·g<sup>-1</sup>·h<sup>-1</sup>), gas flow rate (10 mL/min).

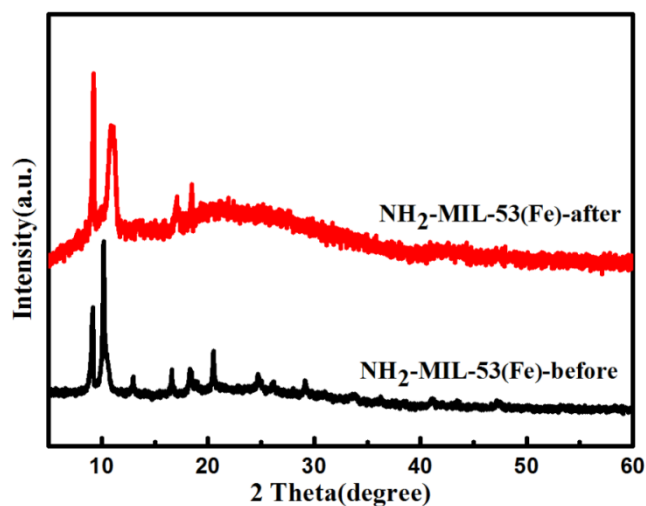

**Figure S7.** XRD patterns of fresh and used NH<sub>2</sub>-MIL-53(Fe) samples.

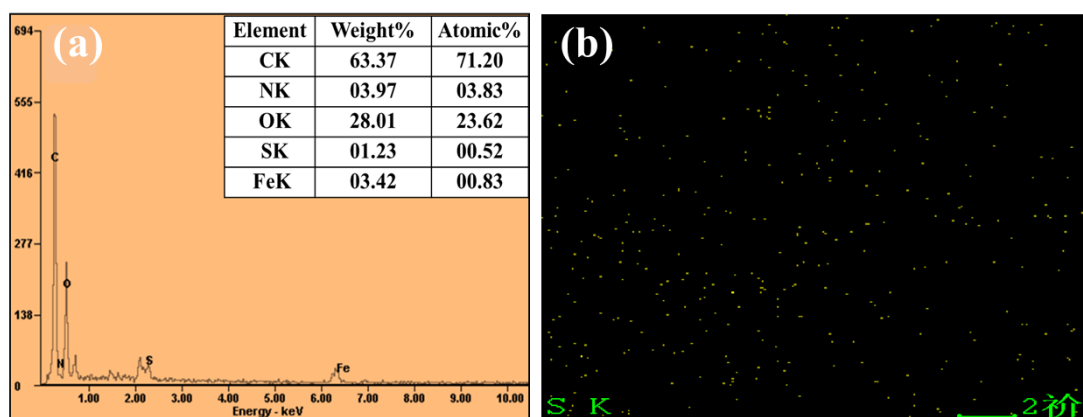

**Figure S8.** (a) EDX spectrum (inset are the elemental ratio of components), and (b) S elemental mapping of used NH<sub>2</sub>-MIL-53(Fe).
